# Supplementary material for: Relevance of ID3-TCF3-CCND3 pathway mutations in pediatric aggressive B-cell lymphoma treated according to the non-Hodgkin Lymphoma Berlin-Frankfurt-Münster protocols
Source: PubMed Central journal article supplement — Haematologica. 2017 Jun;102(6):1091–8. doi: 10.3324/haematol.2016.156885 (PMC5451341; doi:10.3324/haematol.2016.156885), 2017-06
Supplement: 2016_156885-Disclosures_and_Contributions.pdf [file 2016_156885-Disclosures_and_Contributions.pdf]

Haematologica  
HAEMATOL/2016/156885  
Version 3

Relevance of ID3-TCF3-CCND3 pathway mutations in pediatric aggressive B-cell lymphoma treated according to the NHL-BFM protocols

Marius Rohde, Bettina R. Bonn, Martin Zimmermann, Jonas Lange, Anja Möricke, Wolfram Klapper, Ilse Oschlies, Monika Szczepanowski, Inga Nagel, Martin Schrappe, Markus Loeffler, Reiner Siebert, Alfred Reiter, and Birgit Burkhardt

Collaborative Groups: ICGC-MMML-Seq (Gesine Richter, Reiner Siebert, Susanne Wagner, Andrea Haake, Julia Richter, Roland Eils, Chris Lawrenz, Sylwester Radomski, Ingrid Scholz, Anke Bergmann, Christoph Borst, Birgit Burkhardt, Alexander Claviez, Martin Dreyling, Sonja Eberth, Hermann Einsele, Norbert Frickhofen, Siegfried Haas, Martin-Leo Hansmann, Dennis Karsch, Michael Kneba, Jasmin Lisfeld, Luisa Mantovani-Löffler, Christina Stadler, Peter Staib, Stephan Stilgenbauer, German Ott, Lorenz Trümper, Thorsen Zenz, Dieter Kube, Ralf Küppers, Marc Weniger, Michael Hummel, Wolfram Klapper, Ulrike Kostezka, Dido Lenze, Peter Möller, Andreas Rosenwald, Monika Szczepanowski, Ole Ammerpohl, Sietse Aukema, Vera Binder, Arndt Borkhardt, Kebria Hezaveh, Jessica Hoell, Ellen Leich, Peter Lichter, Christina Lopez, Inga Nagel, Jordan Pischimariov, Bernhard Radlwimmer, Philip Rosenstiel, Markus Schilhabel, Stefan Schreiber, Inga Vater, Rabea Wagner, Stephan H. Bernhart, Hans Binder, Benedikt Brors, Gero Doose, Jürgen Eils, Steve Hoffmann, Lydia Hopp, Helene Kretzmer, Markus Kreuz, Jan Korbelt, David Langenberger, Markus Loeffler, Maciej Rosolowski, Matthias Schlesner, Peter F. Stadler, Stefanie Sungalee), MMML-MYC-SYS (Sietse Aukema, Arndt Borkhardt, Birgit Burkhardt, Nina Habermann, Jessica Hoell, Jan Korbelt, Jonas Lange, Inga Nagel, Reiner Siebert, Stefanie Sungalee, Michael Altenbuchinger, Katja Dettmer-Wilde, Lora Dimitrova, Julia Engelmann, Maren Feist, Wolfram Gronwald, Michael Hummel, Karsten Kleo, Dieter Kube, Peter Oefner, Phillip Schwarzfischer, Reiner Spang, Franziska Taruttis, Wolfram Klapper, Monika Szczepanowski, Lorenz Trümper, Hans Binder, Matthias Horn, Markus Kreuz, Henry Löffler-Wirth)

Disclosures: none

Contributions: M.R. and B.B. designed the research and wrote the paper. M.R. performed experiments; M.R. and B.R.B. analyzed results and made the figures; A.T.-S., I.O., W.K., M.S., I.N. and R.S. provided additional information on MYC rearrangement status, I.O and W.K. performed central pathology review to confirm the diagnosis, A.M. and M.S. provided pB-ALL cases, R.S. and M.L. coordinate the ICGC-MMML-Seq and the MMML-MYC-SYS projects, respectively. M.R. and M.Z. performed statistical analyses, M.R., B.R.B., J.L., A.R., W.K., I.O., M.L., R.S. and B.B. discussed and interpreted the results. A complete list of the members of the MMML-MYC-SYS and ICGC-MMML-Seq projects can be found in the data supplement of the online version of this article.
