# Supplementary material for: Relevance of ID3-TCF3-CCND3 pathway mutations in pediatric aggressive B-cell lymphoma treated according to the non-Hodgkin Lymphoma Berlin-Frankfurt-Münster protocols
Source: PubMed Central journal article supplement — Haematologica. 2017 Jun;102(6):1091–8. doi: 10.3324/haematol.2016.156885 (PMC5451341; doi:10.3324/haematol.2016.156885), 2017-06

# ID3-TCF3-CCND3 pathway genes are mutated in more than 88% of MYC rearranged pediatric B-cell Non-Hodgkin lymphoma

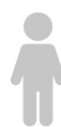

84

Pediatric B-cell Non-Hodgkin lymphoma

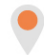

Berlin-Frankfurt-Münster group (NHL-BFM)

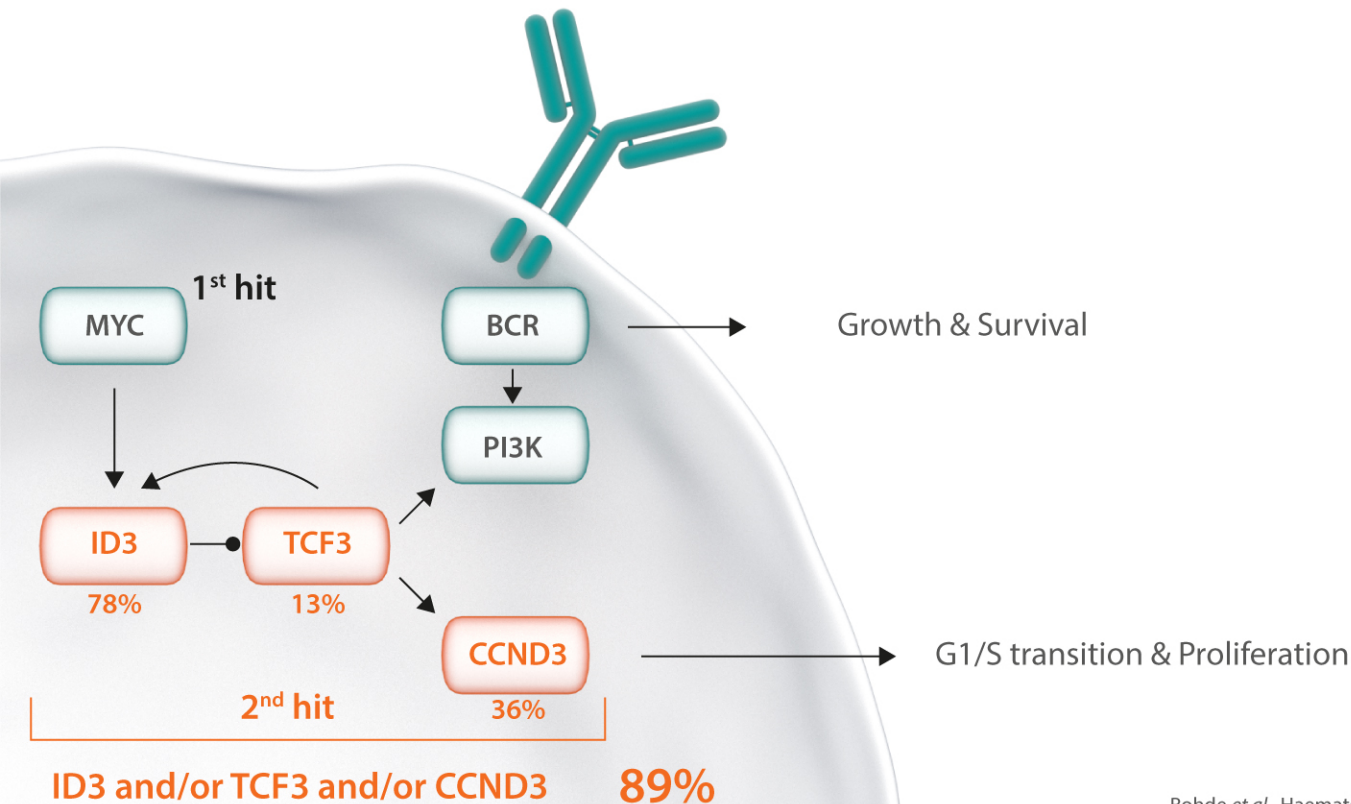

Supplement: HAEMATOL-2016-156885v3-Rohde-01.pdf [file HAEMATOL-2016-156885v3-Rohde-01.pdf]
